1 **Running Title:** An efficient method to store maize pollen

2 **Core Ideas**

- 3 • Manual pollinations in breeding and genetics research requires pollen available when  
4 recipient silks are viable.
- 5 • The method collects and stores maize pollen for at least five days and facilitates efficient  
6 pollination.
- 7 • Pollen is mixed with polyetheretherketone and uses field-collected pollen and simple  
8 storage conditions.
- 9 • The method can increase the number of pollinations per tassel and generates a reasonable  
10 number of viable seeds.

11 **A practical method to improve the efficiency of pollination in maize breeding and genetics**  
12 **research**

13 Dylan L. Schoemaker<sup>1</sup>, Frank McFarland<sup>1</sup>, Brian Martinell<sup>2</sup>, Kathryn J. Michel<sup>1</sup>, Lucas  
14 Mathews<sup>1</sup>, Dan O'Brien<sup>3</sup>, Natalia de Leon<sup>1</sup>, Heidi F. Kaeppler<sup>1,2</sup>, Shawn M. Kaeppler<sup>1,2\*</sup>

15 <sup>1</sup>Department of Agronomy, University of Wisconsin – Madison, 1575 Linden Drive, Madison,  
16 WI 53706

17 <sup>2</sup>Wisconsin Crop Innovation Center, University of Wisconsin – Madison, 8520 University Green,  
18 Middleton, WI 53562

19 <sup>3</sup>O'Brien Hybrids – 552 Glenway Road, Brooklyn, WI 53521

20 Received \_\_\_\_\_. \*Corresponding author [smkaepl@wisc.edu](mailto:smkaepl@wisc.edu)

21 Abbreviations: ANOVA, analysis of variance; DAP, days after pollination; PEEK,

22 polyetheretherketone; PEM, polyethylene microspheres

23

## ABSTRACT

24 Seed increase through manual pollination is a critical part of maize breeding and genetics  
25 research to advance generations in breeding programs, to create desired research crosses, and  
26 produce hybrid seed for trials. Pollination in the field and in controlled environments relies on  
27 the availability of high-quality pollen at the time that recipient silks are receptive. Generally,  
28 pollinations are made by capturing pollen from the tassel in a paper pollinating bag placed on the  
29 tassels one day prior to pollination and newly released pollen is then transferred to silks on the  
30 target plant. In the field, maize pollen is only viable for one to four hours following dehiscence  
31 and the rate of desiccation is influenced by environmental conditions. We have developed a  
32 method which increases the lifespan of pollen and allows pollen from a single tassel to be used to  
33 pollinate many ears by mixing fresh pollen with a dilutant that can be stored for multiple days.  
34 We identified characteristics of the size of suitable substrates and selected a PEEK based  
35 substrate for regular utilization. We evaluated pollen viability and empirically demonstrated the  
36 capability to store pollen up to nine days when pollen is mixed with a PEEK substrate and stored  
37 at 6°C. The pollen storage method was used to make successful pollinations across 24 maize  
38 inbred lines tested and was generally equivalent to the standard manual pollination process. This  
39 method has the potential to increase the efficiency of breeding operations and may be useful in  
40 an array of genetic studies.

41

## INTRODUCTION

42 Access to a sufficient quantity of high-quality pollen when silks of target plants are receptive is  
43 vital for seed production associated with maize breeding and genetics research. Maize pollen is  
44 generally short-lived and sensitive to extreme moisture and temperature (Jones & Newell, 1948;

45 Barnabas, 1985; Buitink et al., 1996; Luna et al., 2001). Methods to store pollen for later use, and  
46 to increase the efficiency of the pollination process, would provide a substantial benefit to plant  
47 breeding and genetics research.

48 Pollen storage and viability has been studied by researchers since the early 1920s to aid breeding  
49 and genetics research (Anthony & Harlan, 1920; Knowlton, 1922). Some of these early studies  
50 have shown that pollen longevity varies across species. For example, barley (*Hordeum vulgare*)  
51 pollen exposed to free air for 10 minutes was inviable due to moisture loss (Anthony and Harlan,  
52 1920). Alternatively, potato (*Solanum tuberosum*) crops are considered desiccation tolerant  
53 (Towill, 1981) because pollen remains viable after desiccation to moisture content as low as 5%  
54 to 7% (Roberts, 1973). Further, Kessler (1930) reported that potato pollen can be viable after 14  
55 days with minimal storage treatments if kept at 15% to 20% relative humidity. When potato  
56 pollen was stored at -20°C for 11 months, the stored pollen generated as many seeds as fresh  
57 pollen (Howard, 1958). Pine (*Pinus ponderosa*) is also desiccation-insensitive and displays a  
58 faster rate of pollen-moisture loss relative to maize when placed on MgCl<sub>2</sub> or Mg(NO<sub>3</sub>)<sub>2</sub> (Connor  
59 & Towill, 1993).

60 Differences among species in the rate of pollen-water loss can affect long-term pollen storability.  
61 For example, broccoli (*Brassica oleracea* var. *italica*) pollen stored in liquid nitrogen for two  
62 months resulted in 43% germination success (Crisp and Grout, 1984). Alternatively, *Linum*  
63 *longiflorum* and maize pollen stored for five months at 0°C to 5°C led to a 25% and 15% pollen  
64 germination rate, respectively (Nath & Anderson, 1975).

65 Beyond storing pollen for seed generation, collecting pollen prior to dehiscence can help  
66 minimize unintended gene flow and therefore contribute to the development useful genetics

67 materials for research. In maize for example, genetically modified (GM) pollen can be blown by  
68 the wind into neighboring fields and lead to genetic erosion (Rogers & Parkes, 1995; Serratos et  
69 al., 1997). As maize pollen is blown via the wind, isolation nurseries are needed to minimize  
70 gene flow from aerial pollen. However, the effective isolation distance is a function of  
71 windspeed, direction, and circulation (Bateman, 1947a and 1947b; Jones & Brooks, 1950;  
72 Raynor et al., 1972; Luna et al., 2001).

73 Minimizing off target pollen movement is also critical for maize hybrid seed production to  
74 ensure purity of hybrid cultivars. Maize hybrid seed production relies on the large quantities of  
75 windblown pollen from one inbred line landing and germinating the receptive stigma of an  
76 adjacent inbred (Heslop-Harrison, 1979; Kiesselbach, 1999). However, this system is resource  
77 intensive and seed production yield decreases when the anthesis-silking interval expands beyond  
78 three days and/or an inbred line has a narrow pollen shed window (DuPlessis & Dijkuis, 1967;  
79 Wych, 1988; Arisnabarreta & Solari, 2017). However, the risk of these latter issues can be  
80 minimized via efficient methods for collecting and dispensing stored pollen. PowerPollen has  
81 developed the first proprietary system for bulk collection, preservation, and on-demand  
82 application of stored maize pollen via electronic sensors attached to a distribution apparatus on a  
83 tractor (Cope & Krone, 2016). The technology and protocols increase seed production yield up to  
84 40% and allows breeders to select inbred parents with greater flexibility  
85 (<https://powerpollen.com/corn-seed/>).

86 When maize pollen is collected, it must be quickly transferred to a substrate to avoid desiccation  
87 as maize pollen is short lived (Berjak et al., 1992). Common substrates previously used for  
88 storing pollen include organic solvents (Iwanami & Nakamura, 1972), polyethylene products,



89 and chemical treatments. Barnabas and Rajki (1976) described the use of a polyethylene  
90 substrate for maize pollen storage. Mineral oil is another substrate used to manipulate pollen. For  
91 mutagenesis, mineral oil is mixed with EMS and applied to fresh maize pollen as a chemical  
92 treatment. The treated pollen is then used to pollinate plants with receptive silks to produce  
93 mutagenised offspring (Neuffer & Coe, 1977; Settles, 2020).

94 Beyond identifying an appropriate substrate, the relative moisture content of the pollen and  
95 ambient temperature were initially shown to influence storability of maize pollen. Once the  
96 pollen and substrate are mixed and placed in an airtight vessel, the container can be kept in liquid  
97 air (Collins et al., 1973) or nitrogen at  $-192^{\circ}\text{C}$  or  $-196^{\circ}\text{C}$ , respectively, for long-term storage.  
98 Barnabas et al. (1988) further demonstrated that when maize pollen is stored at low temperatures  
99 in liquid nitrogen, a 13% pollen water content was optimal for storing pollen up to one week  
100 after pollen collection and led to a 78% seed set.

101 Deep-freezing storage methods can potentially maintain pollen viability for up to a year. Maize  
102 pollen mixed with a polyethylene-based substrate placed in a sealed vessel generated viable  
103 pollen granules after a year of storage (Barnabas & Rajki, 1976), while soybean pollen-  
104 maintained viability for four months if kept at  $-20^{\circ}\text{C}$  (Tyagi & Hymowitz, 2003). While these  
105 deep-freezing techniques are effective at supporting pollen viability for long term storage, Jones  
106 and Newell (1948) focused on cost effective techniques for short term storage. Seed set from  
107 stored maize pollen was observed after 48 hours of storage and pollen viability was maintained  
108 up to eight days if kept at  $4.4^{\circ}\text{C}$  and 90% relative humidity (RH) but decreased to six days if RH  
109 decreased by 10% (Jones & Newell, 1948). These results suggest that maintaining proper RH is  
110 important for minimizing maize pollen grain desiccation during short term storage.

111 Maize pollen is short lived due to rapid pollen-water loss following dehiscence (Jones & Newell,  
112 1948; Barnabas 1985; Buitink et al., 1996; Luna et al., 2001). External factors such as humidity,  
113 wind, and temperature can accelerate water loss (Roy et al., 1995; Schoper et al., 1987a; Schoper  
114 et al., 1987b) and limit viable pollen availability during seed production. Compared to other  
115 species, maize is considered desiccation intolerant as viability dramatically decreases when  
116 pollen water-content is below 0.4 g g<sup>-1</sup> (Buitink *et al.*, 1996). Luna *et al.* (2001) used *in vitro*  
117 pollen germination assays to demonstrate that pollen could survive for two hours following  
118 dehiscence when released from maize plants grown in an environment with average daily high  
119 temperatures ranging from 28°C to 30°C and average RH from 31% to 53%. However, pollen  
120 viability was influenced by atmospheric water potential (Luna et al., 2001). Pollen drift will vary  
121 by location as the pollen grain temperature will match the air temperature of a given environment  
122 (Aylor, 2003). These results were further supported by Aylor (2004), who observed a 50%  
123 reduction in maize pollen germination after pollen was exposed to direct sunlight and air for 60  
124 to 240 minutes.

125 The goals of this study were to develop and empirically evaluate methods that would permit  
126 cost-effective short-term maize pollen storage under practical field conditions and facilitate  
127 increased efficiency of pollination in breeding and genetics research. We evaluated different  
128 storage method across multiple field-based settings and different genetic backgrounds. We have  
129 utilized this technique extensively in our research program and have found it to be reliable and to  
130 increase pollination process efficiency.

## 131 **2 MATERIALS AND METHODS**

### 132 **2.1 Storage substrate identification**

133 Five potential storage substrates were initially tested to mix with maize pollen. These included  
134 Aeroperl 300/30 from Evonik (product code: 10024572), Sipernat 22 S from Evonik (product  
135 code: 99002421), Sipernat D 13 from Evonik (product code: 10020326), Blue Polyethylene  
136 Microspheres (PEM) from Cospheric (product line: BLPMS-1.00), and DicaLite<sup>(R)</sup> Natural  
137 Diatomaceous Earth from Dicalite Management Group. Each medium was mixed with pollen  
138 collected from maize inbred line PHAJ0 grown in a seed production nursery at the West  
139 Madison Agricultural Research Station in Verona, WI during the summer of 2019. Pollen was  
140 collected by removing tassels pre-pollen shed and placing them in a FloraLife Crystal Clear<sup>(R)</sup>  
141 Flower Food 300 liquid medium under cool-white T12 fluorescent lights to promote anther  
142 exertion. When 50% of the tassel was shedding pollen, anthers were shaken off the tassel  
143 branches and placed into a 120 ml (4 oz) sterile cup. First, the anthers and large debris were  
144 removed by sieving the pollen through a stainless-steel strainer to remove anthers and large  
145 debris (Figure 1B). The pollen was then sieved again through a size 80 mesh (0.180 mm) using a  
146 Tansoole Experimental Sieve to remove small clumps of pollen (Figure 1C). The sieved pollen  
147 was then independently mixed with each of the five storage substrates at a ratio of one part  
148 pollen to five parts substrate (1:5) and poured into a glass scintillation vial (Figure 1D and Figure  
149 1F). The substrate and pollen mix were held horizontally and gently rotated approximately five  
150 times until the medium and pollen was homogenized (Figure 1E). The mixture was either kept in  
151 a sealed 120 ml (4 oz) sterile sample cup and stored in a walk-in cold-room at 4°C (Figure 1F) or  
152 directly used to pollinate plants with receptive silks (Figure 1G).

153 **Figure 1.** Flowchart describing the process of pollen collection, storage, and application. A)  
154 Tassel bags placed on the inflorescence of the pollen parent 24 hours in advance of pollen  
155 collection are removed and the pollen B) is dumped through a metal strainer to remove large

156 debris and a C) 0 mesh sieve is used to remove clumped pollen. D) A concentration of one part  
157 pollen to five parts (1:5) PEEK-MP140 is used and E) mixed. F) The mixed pollen is  
158 immediately stored between 4°C and 6°C in a sealed tight container or transferred to a glass  
159 spice container for application on plants with receptive silks. G) Approximately 0.047 g  
160 ( $\pm 0.003$ ) of mixed pollen is applied per ear shoot and H) pollinated ears are covered with a  
161 tassel bag. I) Examples of ears pollinated with mixed pollen compared to a control self-  
162 pollination (far left) when mixed pollen is stored out to four days.

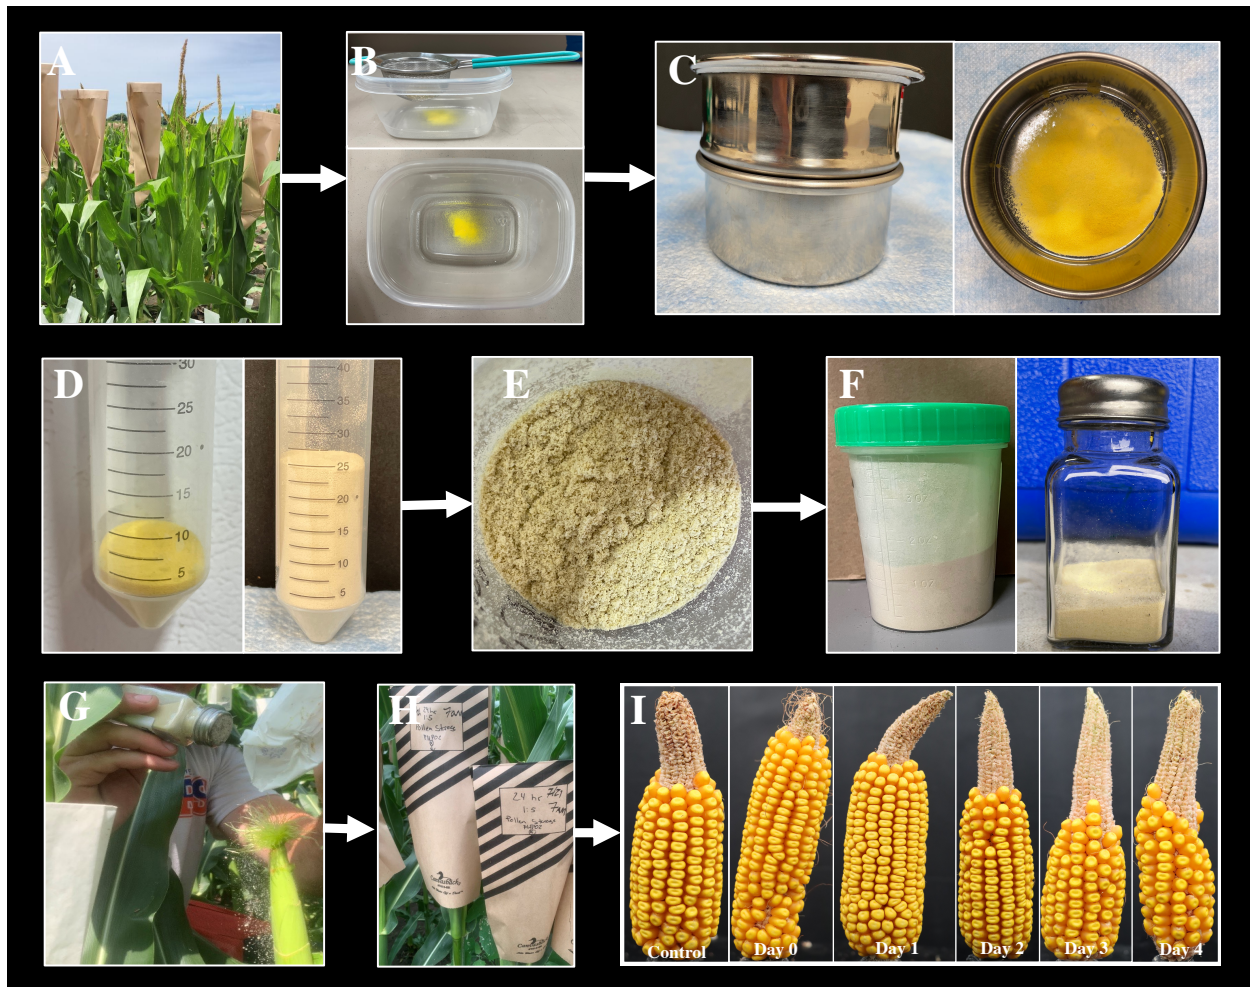

163

164 The mixed maize pollen was applied to ear shoots of seed parent inbred lines that were covered  
165 prior to silk emergence to ensure ovules were pollinated from stored pollen and to prevent

166 contamination from adjacent plants. To make pollinations, the pollen mixture was gently rotated  
167 three times, and a small portion of the dilution was aliquoted into an application vessel that was  
168 either a 50 mL falcon tube or a 2.7 oz glass spice container with approximately five to ten one-  
169 millimeter diameter holes. Approximately three ‘shakes’ of mixed pollen from the vessel was  
170 applied to each ear where a ‘shake’ is defined as the movement of the applicators arm from a 90°  
171 to 45° angle when the container is maintained perpendicular to the forearm (Figure 1G). Based  
172 on the average of 20 replicates, approximately 0.047 g ( $\pm 0.003$  standard error) mixture of  
173 pollen-substrate is applied per maize ear. A tassel bag was immediately placed over the ear shoot  
174 following pollination and stapled together on the opposite side of the ear to prevent pollen from  
175 adjacent plants landing on the inbred silks (Figure 1H).

176 Each of the pollen mixtures were applied to two plants of maize inbred line LH244 with  
177 receptive silks after 2, 6, and 21 days of storage between approximately 9:00 A.M. and 11:00  
178 A.M. On the same day, undiluted stored pollen from PHAJ0 was applied onto two LH244 plants  
179 with receptive silks as a control. Ears were directly covered after the application and harvested  
180 two weeks later. The number of kernels on the each of the four ears was visually counted at the  
181 time of harvest.

182 An additional storage medium, PEEK-MP140, manufactured by PolyClean Technologies Inc.,  
183 was evaluated using a field setting at the West Madison Agricultural Research Station in Verona,  
184 WI during the summer of 2020. PEEK-MP140 is a fine milled powder made from recycled  
185 Polyetheretherketone (PEEK), 450G. Pollen was collected, stored, and applied to targeted plants  
186 with receptive silks using the method described above and in Figure 1. Supplemental File S1 lists  
187 all the steps used to collect, make, and apply mixed pollen to plants with receptive silks. For

188 evaluation of PEEK-MP140, pollen was collected by placing a tassel bag on the inflorescence of  
189 the pollen parent 24 hours in advance and collecting freshly released pollen in the bag. The  
190 collected pollen in the tassel bag was sieved through a metal strainer and size 100 mesh (0.154  
191 mm) to remove anthers and large debris prior to mixing (Figure 1B). The utility of PEEK-MP140  
192 as a storage substrate was evaluated by storing both a one-part pollen to five-part substrate (1:5)  
193 and a one-part pollen to ten-part substrate (1:10) mixture to evaluate how the concentration of  
194 pollen influences grain fill. The mixture was stored in a walk-in cold room at 6°C and then used  
195 to pollinate five different plants of a commercial inbred line with receptive silks every day at  
196 mid-morning for eight days.

## 197 **2.2 Scanning Electron Microscopy imaging**

198 Both PEEK-MP140 and Cospheric blue polyethylene microspheres were further analyzed using  
199 scanning electron microscope (ESM) at the Wisconsin Newcomb Imaging Center (NIC). All  
200 high-resolution images of maize pollen within the medium were captured on a FEI Quanta 200  
201 microscope set to low vacuum (ESEM mode). Prior to imaging, pollen was collected from inbred  
202 line LH244 grown in a greenhouse at the Wisconsin Crop Innovation Center (WCIC) in  
203 Middleton, WI by placing a tassel bag on the inflorescence 24 hours prior to pollen collection.  
204 After 24 hours, the fresh pollen was collected, sieved, and mixed with PEEK-MP140 and PEM at  
205 a 1:5 ratio, as previously described. The mixture was stored for 24 hours at 6°C in a standard  
206 refrigerator prior to imaging.

## 207 **2.3 Experimental design of field trials**

208 The utility of stored maize pollen for breeding and genetics research was assessed using field  
209 settings during the summer of 2020, 2021, and 2022 at the West Madison Agricultural Research



210 Station in Verona, WI. Pollen was collected from inbred lines grown in 12 ft long, single-row  
211 plots using the methods described above. The pollen was sieved and diluted with medium at a  
212 station adjacent to the field using the procedure described in Figure 1 and Supplemental File S1.  
213 The pollen-substrate mixture was either directly transferred to a 2.7 oz glass spice container  
214 (Figure 1F) and applied to plants with receptive silks (Figure 1G) in the mid-morning or kept in a  
215 sealed airtight container and stored at 6°C in a walk-in cold-room for later application.

## 216 **2.4 Experimental assessment of stored pollen over time**

217 In 2020, the method and substrate for storing maize pollen was initially tested by collecting  
218 pollen from a line heterozygous for purple pigmented kernels and applying it to ears of plants  
219 that did not have pigmented aleurone or endosperm. Pollen from the purple kernel inbred line  
220 was collected and stored at 6°C in a walk-in cold-room from one to eight days and mixed with  
221 PEEK-MP140 at both a concentration of 1:5 and 1:10. For each of the eight days, five  
222 pollinations were made between approximately 8:00 A.M and 10:00 A.M. After approximately  
223 40 days after pollinations (DAP), ears from all five replicate pollinations per pollen  
224 concentration and days of storage treatment were collected from the seed parent and visually  
225 inspected to determine if kernels were present on the ear. The proportion of ears out of the five  
226 replicate pollinations per treatment with at least 10 kernels was recorded.

227 In 2021, an experiment was conducted to evaluate how the ratio of pollen to substrate affected  
228 grain fill and determine if the time-of-day mixed pollen is applied to receptive maize silks  
229 impacts seed set. Pollen was collected from the maize inbred PHP02 and mixed with PEEK-  
230 MP140 as previously described. The mixed pollen was then stored for up to 48 hours in both a  
231 1:5 and 1:10 dilution. Each day, both mixtures were used to pollinate six plants with receptive

232 silks of PHP02 every hour between 7:00 A.M. and 12:00 P.M. The ears pollinated with stored  
233 pollen were harvested between 35 and 45 DAP and two images of each ear were captured as  
234 previously described. Grain fill was assessed using the images by visually rating the two images  
235 per ear for the proportion of the ear filled with grain on a one to ten scale (Supplemental Figure  
236 S1) and assigning each ear an average grain fill rating based on the two images.

237 The average percent grain fill over the six replicate pollinations was analyzed using an analysis  
238 of variance (ANOVA) to test for the effect of the timing of the pollen application and pollen to  
239 substrate ratio using the equation  $y_{ij} = \text{Time}_i + \text{Ratio}_j + \varepsilon_{ij}$ . Time refers to the effect of the  $i^{\text{th}}$   
240 time between 7:00AM and 12:00P.M. and Ratio corresponds to the effect of  $j^{\text{th}}$  pollen to  
241 substrate ratio being either 1:5 or 1:10. The residuals were independent and identically  
242 distributed,  $\varepsilon_{ij} \sim N(0, \sigma_\varepsilon^2)$ . A Tukey Honest Significant Difference (HSD) test was conducted  
243 *post-hoc* using an experimental wise error rate ( $\alpha_E$ ) of 5% to test for significant differences  
244 between each combination of time and ratio.

245 In 2022, grain fill from stored pollen was studied across two different fields planted on May 11<sup>th</sup>  
246 and June 3<sup>rd</sup>, corresponding to an early and late planting date for our region, respectively. Pollen  
247 from the maize inbreds LH244, LH287, and PH24E was collected from tassels when at least  
248 50% of the plant's main tassel was shedding pollen. The pollen was mixed with PEEK-MP140 at  
249 a ratio of 1:5 and stored up to 10 days at 6°C. The pollen mixture for each inbred line was used  
250 to pollinate six plants with receptive silks of LH244 each day, including the initial day of  
251 collection (Day 0). Each day, an additional three self-pollinations were made using the standard  
252 bagging method as a control by taking pollen directly from a tassel bag that was placed the



253 previous day on the inflorescence of the seed parent inbred LH244 and directly transferring the  
254 pollen to the ear.

255 The ears pollinated with the stored mixed pollen were collected between 40 and 45 days DAP.  
256 For each ear, an image was captured. The ear was then rotated 180° and second image was  
257 recorded such that there were two images per ear. A visual rating for percent grain fill was given  
258 to each image based on a one to ten scale (Supplemental Figure S1) and the number of kernels on  
259 the ear were visually counted. The average visual rating across the two images and total kernel  
260 count across the two images per ear was used for further analysis.

261 The average number of kernels per ear and average percent grain fill over the six replicate  
262 pollinations was analyzed using an ANOVA in R-software based on the model  $y_{ij} = \text{Storage}_i +$   
263  $\text{Planting}_j + \varepsilon_{ij}$ . Storage refers to the  $i^{\text{th}}$  number of days that the pollen mixture was stored prior  
264 to making pollinations in the field. The terms Inbred and Planting refer to the effect of the  $j^{\text{th}}$   
265 planting date (Planting Date 1 or Planting Date 2), respectively and the residuals were assumed  
266 to be independently and identically distributed,  $\varepsilon_{ij} \sim N(0, \sigma_\varepsilon^2)$ . A Welch's t-Test was used to  
267 compare grain fill per each inbred and storage interval combination to that of the control self-  
268 pollinations made on the same day. Finally, a Tukey *post-hoc* test was conducted across the three  
269 inbred lines and per combination of inbred and planting date to compare seed set between lines  
270 and over time per inbred line at an experiment-wise error rate ( $\alpha_E$ ) of 5%.

## 271 **2.5 Experimental assessment of stored pollen across diverse inbred lines**

272 To test the efficiency of the pollen collection method across inbred lines, pollen across 24  
273 diverse inbreds among the major and sub-heterotic groups (White et al., 2020) was collected  
274 from the field and stored up to 24 hours prior to making pollinations. Pollen across each inbred

275 line was collected when at least 50% of the plants for each line were shedding pollen. The pollen  
276 was then mixed with the PEEK-MP140 at a ratio of 1:5.

277 **Table 1.** Inbred selection and heterotic group designation of 24 inbred lines

| <b>Inbred</b> | <b>Heterotic Group</b> |
|---------------|------------------------|
| 3IIIH6        | Iodent                 |
| 91BMA2SR*     | B14                    |
| F BLL         | B73                    |
| LH188         | Lancaster              |
| LH198         | B73                    |
| LH200         | B73                    |
| LH223         | B14                    |
| LH225         | B14                    |
| NKH8431*      | B73                    |
| NP2011        | B73                    |
| NP2031        | Flint                  |
| NP2151*       | B73                    |
| NP764         | B73                    |
| NP942         | Iodent                 |
| PH06N         | Iodent                 |
| PH09E         | B37                    |
| PH41E         | Iodent Lancaster       |
| PH44A         | B37                    |
| PHJ89         | Oh43                   |
| PHN46         | Iodent Lancaster       |
| PHR31         | Iodent                 |
| PHW03         | Flint                  |
| PHW20         | Flint                  |
| WQCD10        | B73                    |

278 \*Inbred line was absent from White et al. (2020), so heterotic grouping was inferred based on  
279 pedigree information.

280 Pollinations were made the day pollen was collected (Day 0) and 24 hours after collection (Day  
281 1). On each day, four LH244 plants with receptive silks were pollinated using the mixture and  
282 three self-pollinations of LH244 were made as controls. Images were acquired and used for  
283 visual rating and counting the number of kernels on each ear as described above. The effect of  
284 inbred on storage time was analyzed based on the average number of kernels over the four

285 replicates using an ANOVA based on the model  $y_{ij} = \text{Inbred}_i + \text{Storage}_j + \varepsilon_{ij}$ . Where Inbred  
286 corresponds to the effect of  $i^{\text{th}}$  line and Storage is the effect of the  $j^{\text{th}}$  storage interval. The  
287 residuals were independent and identically distributed,  $\varepsilon_{ij} \sim N(0, \sigma_\varepsilon^2)$ . A two-sample Welch's t-  
288 Test assuming unequal variance was used to compare grain fill per each inbred and storage  
289 interval combination to that of the control self-pollinations made on the same day. A Welch's t-  
290 Test was also used to compare grain fill between days zero and one per inbred line.

### 291 **3 RESULTS AND DISCUSSION**

#### 292 **3.1 Assessment of storage substrate**

293 The objective of this work was to develop and evaluate a method for cost-effective storage of  
294 maize pollen and efficient use of the pollen for breeding and genetics research. We observed that  
295 pollen that was stored without a substrate tended to quickly clump likely due to a chain-reaction  
296 of lysing pollen grains in contact with micro-environmental conditions. The literature also  
297 supports that mixing pollen with substrates could improve storability (Barnabas & Rajki, 1976).  
298 Two different substrates that supported successful pollen storage were initially identified, PEEK-  
299 MP140 and blue polyethylene microspheres (Figure 2). Of those substrates, the PEEK-MP140  
300 was easily available and inexpensive and subsequently used for testing.

301 The hypothesis is that a substrate similar in size (approximately  $90\mu\text{m}$  to  $100\mu\text{m}$ ) to typical  
302 pollen grains (Wodehouse, 1935; Jones & Newell, 1948) is more likely to form a homogenous  
303 mixture. If the substrate was larger than the pollen, the granules would sink to the bottom of the  
304 vessel and affect the homogeneity of the mix dispensed onto the silks of the seed parent. Based  
305 on this hypothesis, silica powders, polymer microspheres, diatomaceous earth, perlite powders

306 and PEEK were initially evaluated for their ability to store maize pollen. Initial assessment  
307 demonstrated that PEEK-MP140 from PolyClean Technologies Inc. (Table 2) and blue  
308 microsphere polyethylene (PEM) could effectively store maize pollen (Supplemental Table S1).

309 **Figure 2.** A) Scanning electron microscopy (SEM) images of a ground PEEK substrate called  
310 PEEK-MP140, B) SEM image of the PEEK-MP140 substrate mixed with pollen after 24 hours  
311 storage at approximately 6°C. D) SEM images of blue polyethylene microspheres (PEM) E) and  
312 SEM image of PEM mixed with pollen and stored for 24 hours. Example images of C) PEEK-  
313 MP140 and F) PEM mixed with pollen and applied to receptive silks after the mixture was stored  
314 for 24 hours at 6°C.

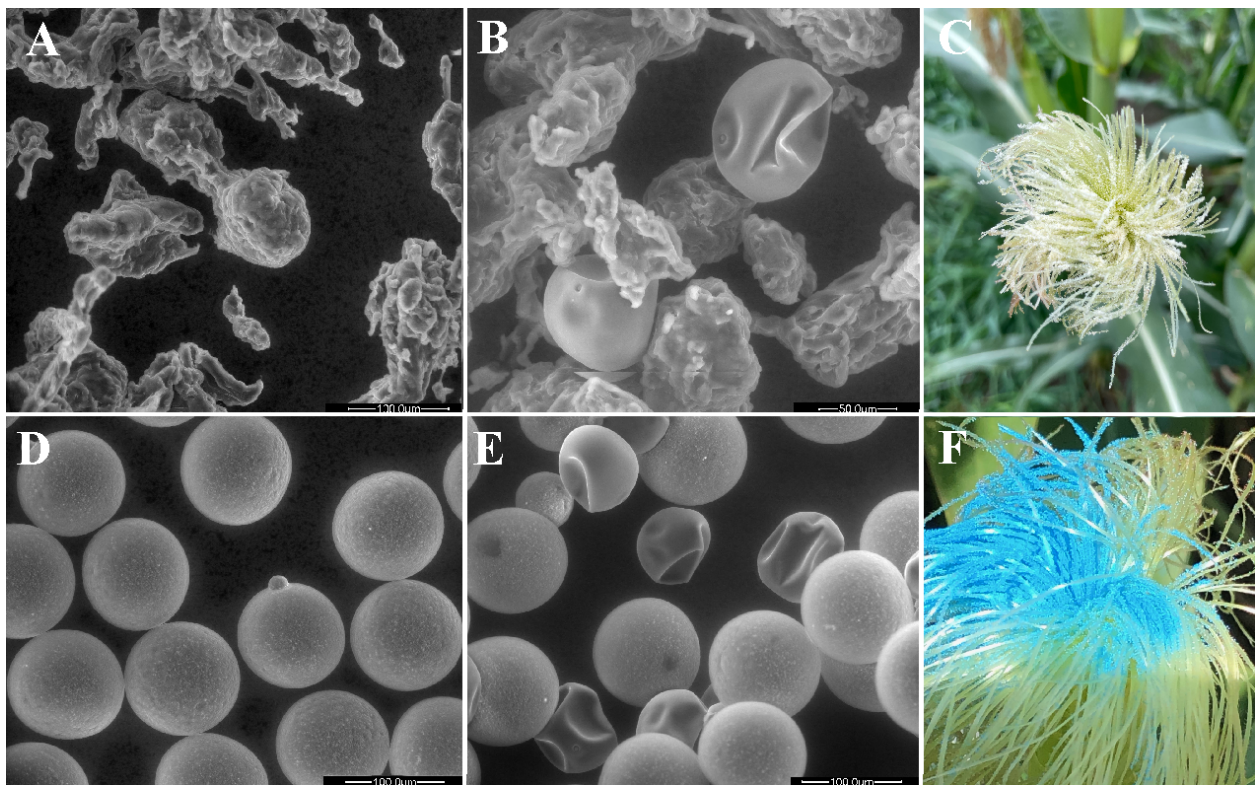

315

316 Scanning electron microscopy allowed us to capture high-resolution close-up images of single  
317 pollen granules from the inbred line LH244 within each of the two substrates (Figure 2B and

318 2E). Observational analysis of the SEM images demonstrates that both substrates are similar in  
319 size to that of a single pollen granule but have distinct morphological characteristics (Figure 2).  
320 For example, the PEEK-MP140 substrate is approximately the same size as a single pollen  
321 granule, but each individual granule contains an irregular and non-consistent morphological  
322 shape (Figure 2A and 2B). Alternatively, each individual PEM particle is an identical sphere  
323 similar in size to a grain of pollen (Figure 2D and Figure 2E). In comparison, diatomaceous earth  
324 is a ground powder substantially smaller than an individual pollen grain. Diatomaceous earth and  
325 the silica powders failed to maintain pollen viable in initial tests (Supplemental Table S1). The  
326 PEEK substrate was acquired for approximately \$0.07 per gram compared to \$15.00 per gram  
327 for PEM, which was previously used for pollen cryopreservation (Barnabas & Rajki, 1976).  
328 Using a PEEK based product is a 214-fold decrease in cost compared to polyethylene substrates  
329 as used by Barnabas & Rajki (1976), improving the cost-effectiveness of this protocol for storing  
330 maize pollen.

### 331 **3.2 Evaluation of maize pollen storability**

332 The method for collection and storage of maize pollen was evaluated over three years beginning  
333 in 2020 using field experiments. Initial assessments of the method evaluated its utility for hybrid  
334 seed production in a breeding nursery and evaluated the effect of pollen concentration on seed  
335 set when the mixture was stored for up to eight days. Seed set was observed on two maize inbred  
336 lines pollinated after maize pollen was stored up to six days, but grain fill was not observed on  
337 day eight. A 1:5 ratio of pollen to PEEK-MP140 consistently generated more kernels per ear  
338 compared to a 1:10 ratio and grain fill decreased over storage time (Table 2). After the pollen  
339 mixture was stored for six days, only a few kernels were detected and just scattered throughout

340 the ear (Supplemental Figure S2B and S2D). Overall, our results demonstrated that a sufficient  
341 proportion of maize pollen granules are viable up to six days of storage if quickly mixed with  
342 PEEK-MP140 as grain fill was observed on approximately 50% of the ear (Supplemental Figure  
343 S2). When the pollen mix was stored beyond 24 hours, a greater concentration of pollen to  
344 medium increased the number of kernels produced (Table 2), suggesting that the ratio of pollen  
345 to PEEK-MP140 is a critical variable in the procedure and pollen concentration influences seed  
346 set.

347 **Table 2.** Percentage of ears out of five replicate pollinations with kernels at harvest that were  
348 pollinated with mixed pollen stored up to eight days using a 1:5 and 1:10 ratio of pollen to  
349 PEEK-MP140

| <b>Inbred</b> | <b>Storage Interval (Days)</b> | <b>Pollen to Substrate Ratio</b> | <b>Percent</b> |
|---------------|--------------------------------|----------------------------------|----------------|
| Commercial 1  | 1                              | 1:5                              | 100            |
| Commercial 1  | 1                              | 1:10                             | 80             |
| Commercial 1  | 2                              | 1:5                              | 100            |
| Commercial 1  | 2                              | 1:10                             | 100            |
| Commercial 1  | 3                              | 1:5                              | 100            |
| Commercial 1  | 3                              | 1:10                             | 60             |
| Commercial 1  | 4                              | 1:5                              | 100            |
| Commercial 1  | 4                              | 1:10                             | 100            |
| Commercial 2  | 5                              | 1:5                              | 100            |
| Commercial 2  | 5                              | 1:10                             | 60             |
| Commercial 2  | 6                              | 1:5                              | 100            |
| Commercial 2  | 6                              | 1:10                             | 80             |
| Commercial 2  | 8                              | 1:5                              | 0              |
| Commercial 2  | 8                              | 1:10                             | 0              |

350 The experimental results from the summer of 2020 demonstrated that the method for pollen  
351 collection and storage can generate hybrid seed after six days of storage. However, we found that  
352 the pollen concentration can influence seed set. With this information, we implemented the  
353 procedure for seed production in our maize breeding and genetics research program beginning in  
354 2021 and consistently observed ears with complete grain fill at harvest (Supplemental Figure  
355 S3). That same summer we harvested approximately 1.2 million kernels across 1,506 nursery

356 rows when six to fifteen ears per row on average were pollinated with mixed pollen. We have  
357 observed that collecting and mixing pollen in a storage substrate increases the number of seed  
358 parents that can be pollinated compared to traditional hand crossing. From routine utilization of  
359 this method within our breeding program, five milliliters of pollen collected from five to 25  
360 tassels, dependent on inbred, can produce a pollen mix that can pollinate more than 200 plants or  
361 more than 10 pollinations per tassel.

### 362 **3.3 Evaluation of timing of pollination**

363 In 2021, the importance of the concentration of pollen to PEEK-MP140 was evaluated. Pollen  
364 from the inbred line PHP02 was collected and mixed with PEEK-MP140 using both a 1:5 and  
365 1:10 dilution. The two different mixtures were stored for 48 hours and then each mixture was  
366 applied to ears of PHP02 plants with receptive silks. The pollen was applied every hour between  
367 7:00 A.M. and 12:00 P.M. and we observed that the timing of application did not significantly  
368 influence percent grain fill (P-value > 0.05) while the ratio of pollen to substrate did significantly  
369 influence grain fill when the mixture was stored for 48 hours (P-value < 0.05) across these times  
370 and days of storage (Supplemental Table S2). On average, using a 1:5 ratio mixture led to a  
371 larger number of ovules successfully pollinated based on visually rating of percent grain fill  
372 relative to a 1:10 ratio (Figure 3). Having more pollen in the mix may be adventitious as having  
373 more granules in the mixture increases the probability that a viable pollen granule will land on a  
374 silk, germinate, and fertilize an ovule (Heslop-Harrison, 1979). A significant difference between  
375 the two ratios was only observed when pollinations were made at 9:00 A.M. or 10:00 A.M. and  
376 that difference changed depending on if the mixture was stored for 24 or 48 hours (Figure 3).



377 **Figure 3.** Grain fill at harvest based on visual rating for percent grain fill for the evaluation of  
378 PHP02 pollen mixed and stored in PEEK-MP140 for A) 24 and B) 48 hours prior to being  
379 applied to PHP02 plants with receptive silks. Orange bars show the 1:5 ratio of pollen to PEEK-  
380 MP140 and blue bars show the 1:10 ratio with red standard error bars. ‘\*’ and ‘\*\*’ correspond to  
381 P-values < 0.05 and P-values < 0.01 respectively based on a Welch’s t-Test between the 1:5 and  
382 1:10 ratio per time and hours of mixed pollen storage.

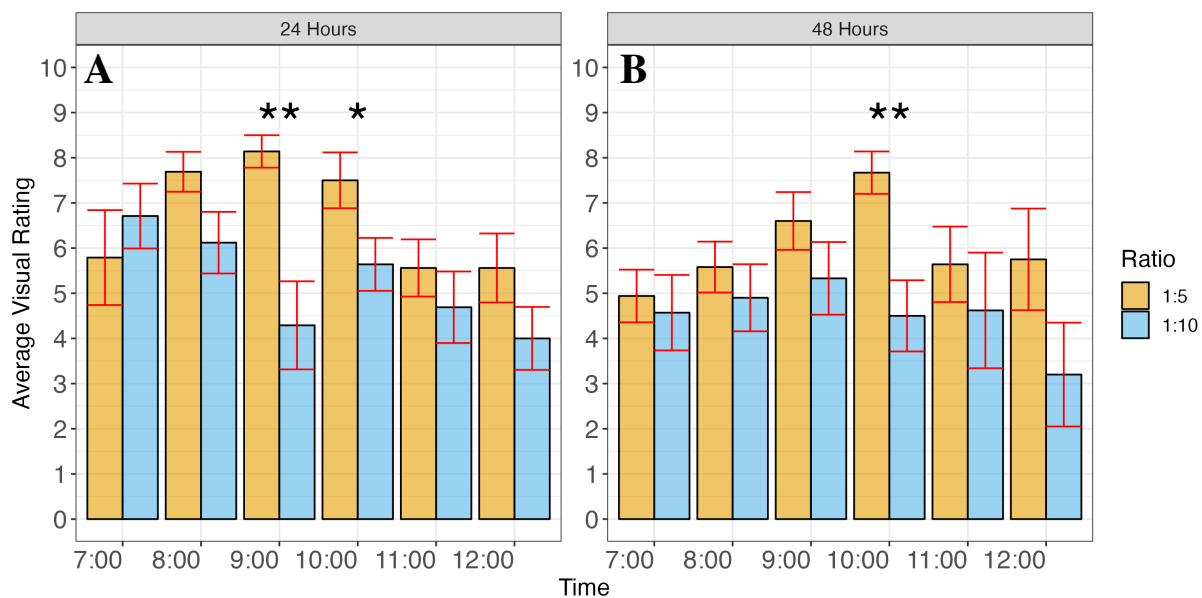

383

384 The proportion of the ear with grain after the pollen mixture was stored for 24 hours was  
385 maximized when pollinations were made during the mid-morning or between 9:00 A.M. and  
386 10:00 A.M. (Figure 3A). However, we generally observed that the average grain fill between  
387 each combination of pollen concentration and timing of application per storage interval was not  
388 significantly different based on a 5% experimental wise error rate using a Tukey *post-hoc*  
389 analysis. Storing pollen from inbred line PHP02 resulted in a decrease in grain fill between days  
390 one and two but even after 48 hours of storage, grain was observed on over 50% of the ear  
391 (Figure 3). Practically, seed generation via hand crossing where pollen in the tassel bag is carried



392 to the seed parent would not be possible most days prior to late morning or early afternoon  
393 within our geographic region as heavy moisture in the bag of pollen would lead to pollen  
394 bursting and dehiscence of new pollen would not yet have occurred due to insufficient heat (Bair  
395 & Loomis, 1941). Heavy rainstorms can also lead to total saturation and loss of the tassel bag,  
396 prolonging the period from silk emergence to pollination, potentially leading to a loss in grain fill  
397 due to reduced silk receptivity associated with aging of the flower (DuPlessis & Dijkuis, 1967;  
398 Wych, 1988; Bassetti & Westgate, 1993). Using stored maize pollen for crossing in a breeding  
399 program has the potential to mitigate these issues by allowing pollen to be collected from plants  
400 grown in a controlled environment or from a previous day and transported to a field when the  
401 silks on the ear are at prime receptivity.

### 402 **3.4 Evaluation of pollen storability across planting dates**

403 In 2022, our method was directly compared to the current standard self-pollination procedure as  
404 a control. Pollen from the inbred lines LH244, PH24E, and LH287 was collected and stored then  
405 used to pollinate LH244 plants with receptive silks. The number of kernels harvested from the  
406 controls across two planting dates was used as a baseline to compare relative grain fill success.  
407 Among the controls, seed production was lower for the first planting compared to the second  
408 planting as the average number of kernels observed on the ears of the controls was 250 and 157  
409 kernels per ear for the first and second planting date, respectively (Figure 4). As a percentage of  
410 the control, seed set using collected and stored pollen was lower on average for the first planting  
411 but outperformed the controls on day zero and one for the second planting (Figure 5).

412 **Figure 4.** The average number of kernels harvested across planting dates for the controls shown  
413 by the dashed red line. Controls are defined as the self-pollination of the inbred line LH244.

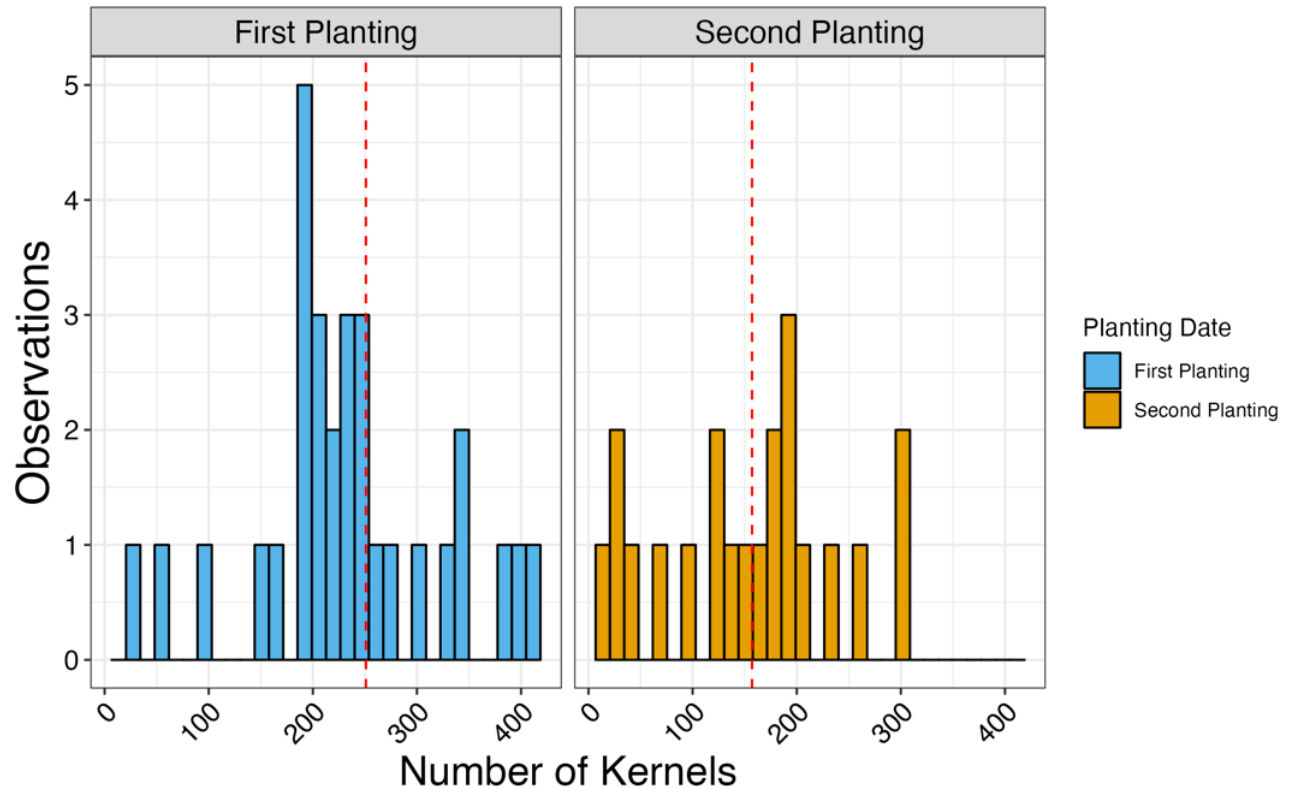

414

415 **Figure 5.** The average number of kernels harvested among ears pollinated with mixed pollen  
416 stored up to six days using a 1:5 ratio compared to the average number of kernels harvested from  
417 the controls per planting date. The average number of kernels harvested for the controls per  
418 planting date is shown by the horizontal black dashed line. Results shown for two different  
419 planting dates that correspond to an early (First Planting) and late planting (Second Planting)  
420 within Central, WI. Red bars show the standard error of the mean across the three inbred lines  
421 per storage interval. Bars are color coded by days of storage.

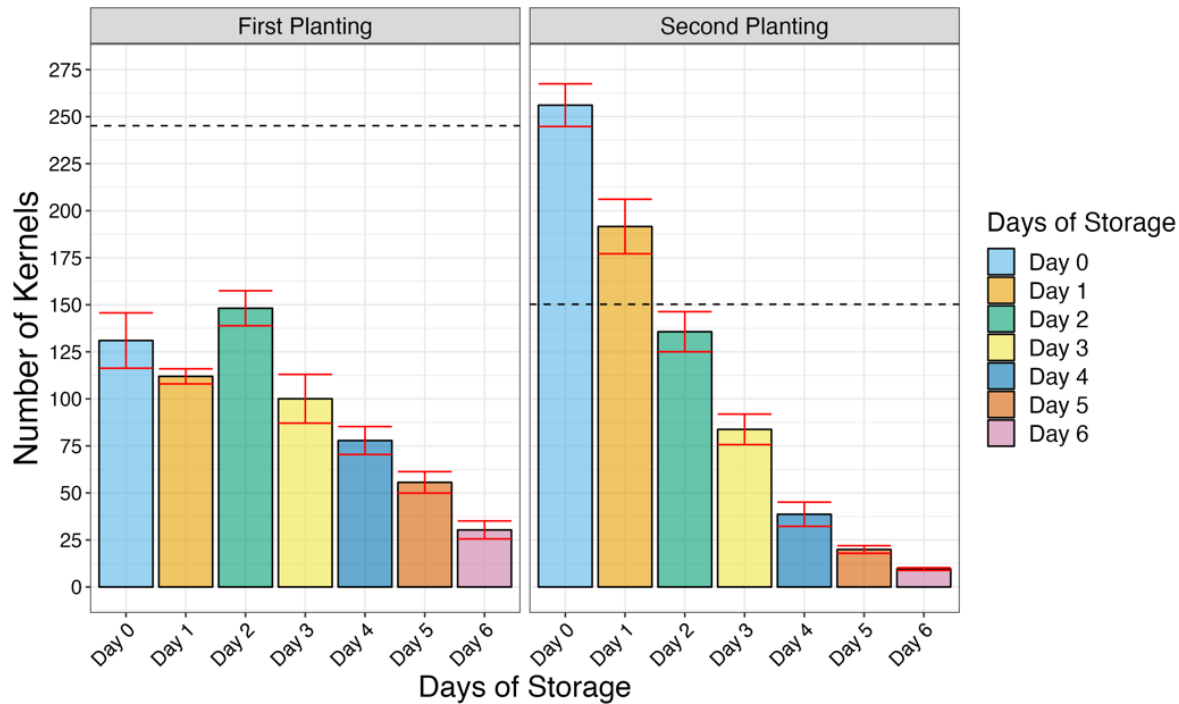

422

423 Grain fill appeared to dramatically decrease between day five and six (Figure 5) and a maximum

424 34 kernels on average were harvested after five days of storage, so the average number of kernels

425 per ear across the six replicate pollinations analyzed only considered days zero to five of storage.

426 Additionally, no pollinations were made after six days of storage for the second planting as no

427 silks were available due to high Corn Rootworm Beetle (genus *Dabrotica*) pressure.

428 **Table 3.** ANOVA for the average number of kernels per ear and visually rated percent grain fill  
 429 per ear when pollen from the inbred lines LH244, PH24E, and LH287 is collected and stored for  
 430 five days and used to pollinate the inbred line LH244

|                 | Number of Kernels |         | Percent Grain Fill |         |
|-----------------|-------------------|---------|--------------------|---------|
|                 | F                 | P-value | F                  | P-value |
| Days of Storage | 3.519             | 0.001   | 4.160              | 0.006   |
| Planting Date   | 0.418             | 0.523   | 0.172              | 0.680   |

431 Storage interval was significant while planting date did not significantly affect grain fill (Table

432 3). In general, more kernels were harvested from the standard controlled pollinations compared

433 to the ears pollinated with the mixed pollen after maize pollen was stored for 48 hours (Figure 5).

434 However, the mixed pollen method was highly effective and there were multiple examples where

435 the mixed pollen outperformed the control. For example, more kernels were harvested from ears  
436 pollinated with stored PH24E pollen than the controls for the second planting on days zero to  
437 three. For LH244, a greater number of kernels were harvested using mixed pollen compared to  
438 the control pollinations on day one and two for the first planting and on day zero and one for the  
439 second planting. These results suggest that the method has the potential to outperform the  
440 traditional self-pollination procedure even when maize pollen is stored up to 72 hours.

441 The experimental results in 2022 demonstrated that at least 50 kernels can be harvested after  
442 mixed pollen is stored for five days (Figure 5). For the second planting date, pollen from PH24E  
443 successfully generated at least 50 kernels after five days of storage (Supplemental Table S3).  
444 Variation in seed set among ears pollinated with the three different inbred parents is likely due to  
445 technical variation introduced by a day effect and differences in timing of collection. For  
446 example, LH244 is later maturing compared to PH24E and LH287, so pollen was collected two  
447 days after the latter two inbred lines for the first planting date. For the second planting date,  
448 LH287 and LH244 was collected in the late afternoon while PH24E pollen was collected the  
449 following day at mid-morning. However, after five days of storage, 100 kernels or approximately  
450 50% of the ear was covered with grain at five days of storage when plants with receptive silks  
451 were pollinated with PH24E pollen, and 51 kernels were still harvested when plants were  
452 pollinated with LH244 pollen. When plants were pollinated with pollen from LH244 or PH24E,  
453 almost 100 kernels were harvested after four days of storage for the first planting date  
454 (Supplemental Table S3). These results suggest that efficiently mixing the PEEK-MP140  
455 substrate with pollen adjacent to the field and quickly transporting the mixture to a cool  
456 environment at approximately 6°C has the potential to maintain enough pollen granules viable  
457 for sufficient seed production in a breeding and genetics program.

458 Interestingly, when we averaged across the three pollen parents for this analysis, we observed a  
459 greater number of kernels harvested using mixed pollen compared to the controls on days zero  
460 and one for the second planting date. These results suggest that the method can work effectively  
461 for collecting pollen even late in the growing season within our geographic region. High  
462 temperatures are known to accelerate the rate of pollen desiccation via rapid pollen-water loss  
463 and there is a negative correlation between pollen desiccation rate and temperature (Schoper et  
464 al., 1987a and 1987b; Roy et al., 1995). Given this biological understanding and our experience  
465 using the method for seed production in our breeding program, we recommend collecting pollen  
466 for storage in the morning when the tassel bag is dry and right at the start of dehiscence to  
467 maximize pollen quality for storage and use.

468 Additional external environmental factors such as high insect pressure caused by Corn Root  
469 Worm beetles could have contributed to both the plant-to-plant variation in grain fill for a given  
470 storage treatment and potentially introduce contamination. Insect pressure was substantial in the  
471 second planted material in 2022. Plant-to-plant variation can have a large effect on overall seed  
472 set due to differences in silk brush receptivity between ears (Westgate & Boyer, 1986; Aylor,  
473 2004). The controls exhibited variation in grain fill both within and between planting dates  
474 (Figure 4) suggesting that factors outside of the methods described for collection and storage of  
475 maize pollen influence the number of kernels harvested during seed production. Therefore, the  
476 described method appears effective for seed production throughout the growing season and is not  
477 limited by planting date.

478 The variation in grain fill between control plants and plants pollinated with mixed pollen was  
479 similar up to four days of storage for both plantings. By day five for the first planting, the

480 standard deviation in grain fill was greater among the controls compared to the pollinations made  
481 using the mixed pollen. Interestingly, the variation in grain fill can potentially be reduced using  
482 stored pollen compared to self-pollinations as exemplified on day one for the second planting,  
483 where the average grain fill standard deviation when using stored pollen was 60.10 kernels  
484 compared to 67.30 kernels for the controls. These results suggest that using stored pollen may  
485 help reduce plant-to-plant variability in grain fill during seed production.

486 **Table 4.** Average grain fill over time per inbred line and planting date based on the number of  
487 kernels per ear when mixed maize pollen is stored out to six days. Letters represent significant  
488 differences in grain fill between day zero and six for each inbred line per planting date based on  
489 Tukey Honest Significant Difference (HSD) test at a 5% experiment-wise error rate. Missing  
490 values (NA) represent days where no pollinations were made due to inclement weather.

| <b>First Planting</b>  |              |              |              |              |              |              |              |
|------------------------|--------------|--------------|--------------|--------------|--------------|--------------|--------------|
|                        | <b>Day 0</b> | <b>Day 1</b> | <b>Day 2</b> | <b>Day 3</b> | <b>Day 4</b> | <b>Day 5</b> | <b>Day 6</b> |
| <b>LH244</b>           | 113.83b      | 255.50a      | 249.33a      | 127.80b      | 92.83b       | 51.00b       | 34.33b       |
| <b>LH287</b>           | 125.00a      | 20.40b       | 47.14b       | 64.67ab      | 48.20b       | 11.20b       | NA           |
| <b>PH24E</b>           | 154.17a      | 60.00ab      | 148.00a      | 107.67ab     | 92.50ab      | 104.67ab     | 26.33b       |
| <b>Second Planting</b> |              |              |              |              |              |              |              |
|                        | <b>Day 0</b> | <b>Day 1</b> | <b>Day 2</b> | <b>Day 3</b> | <b>Day 4</b> | <b>Day 5</b> | <b>Day 6</b> |
| <b>LH244</b>           | 290.33a      | 175.33b      | 68.20c       | 39.83c       | 17.00c       | 11.50c       | NA           |
| <b>LH287</b>           | 142.17a      | 103.83ab     | 66.83ab      | 50.67ab      | 9.83b        | 0.05b        | 1.33b        |
| <b>PH24E</b>           | 335.83a      | 295.67a      | 272ab        | 160.83bc     | 89.17c       | 47.83c       | 17.75c       |

491 Collecting maize pollen directly from tassels, mixing the pollen with a substrate, and directly  
492 using the mixture to pollinate ears with receptive silks has the potential to generate grain fill  
493 similar that if mixed pollen was stored for five days (Table 4). For example, while grain fill was  
494 lower at day five relative to day zero when pollen was collected from inbred line PH24E, the  
495 number of kernels on the ear between those two days was not significantly different (Table 4).  
496 These results were also supported by our binary assessments of grain fill in 2020 where on  
497 average, 50% of the ear exhibited grain fill at both day zero and five (Table 2). Jones and Newell  
498 (1948) observed that seed set dramatically decreased after two days when the inflorescence  
499 containing unreleased pollen was refrigerated. However, the method that we describe allows

500 storage for at least five days. Additionally, over 25% of the ear can still be filled with grain after  
501 six days and up to 20 kernels were observed on the ear after eight days of storage (Supplemental  
502 Table S3) with the amount of pollen mixture applied.

503 Future investigations using pollen germination assays could help estimate the proportion of  
504 viable granules in the mixture at five days or greater of storage to determine if a greater  
505 concentration of pollen to media is required for storage beyond five days. Additionally, an initial  
506 pollen germination assay could help determine if the variability in grain fill over time (Table 4)  
507 is associated with the number of viable pollen granules harvested during collection. However,  
508 the goal of this paper was to describe a method for collecting maize pollen and demonstrate the  
509 utility of using stored maize pollen for seed production in breeding programs, so the  
510 aforementioned two hypotheses are a subject of future research.

511 Seed set was observed on LH244 ears pollinated with maize pollen collected after nine days of  
512 storage with a maximum of 12 kernels per ear observed on day nine (Supplemental Table S3).  
513 Therefore, the procedure can lead to seed production with some level of success after nine days  
514 of storage. These results are consistent with the findings of Jones and Newell (1948) who also  
515 observed seed set on maize cultivars pollinated with pollen stored for nine days. In comparison  
516 to the work of Jones and Newell (1948), our procedure works by diluting the concentration of  
517 pollen via mixing the pollen with a PEEK based substrate to increase the number of plants that  
518 can be pollinated per bag of collected pollen.

### 519 **3.5 Evaluation of pollination effectiveness across diverse maize inbreds**

520 **Table 5.** Average mean and maximum grain fill over four replicates when maize pollen was  
521 collected and mixed with PEEK-MP140 across 24 different inbred lines and used to pollinate

522 LH244 silks immediately (Day 0) or after mixed pollen was stored for 24 hours (Day 1). ‘\*’ and  
 523 ‘\*\*\*’ correspond to P-values < 0.05 and P-values < 0.01 respectively based on Welch’s t-Test  
 524 comparing mean grain fill among ears pollinated with mixed pollen to the control self-  
 525 pollinations on the same day.

| Inbred   | Mean    |          | Max   |       |
|----------|---------|----------|-------|-------|
|          | Day 0   | Day 1    | Day 0 | Day 1 |
| 3IHH6    | 106.25* | 35.25**  | 142   | 79    |
| 91BMAS2R | 132.75  | 136.75*  | 227   | 165   |
| FBLL     | 174.75  | 152.25** | 295   | 208   |
| LH188    | 129     | 270      | 188   | 270   |
| LH198    | 143.25  | 44       | 212   | 44    |
| LH200    | 154*    | 143*     | 248   | 245   |
| LH223    | 209.75  | 16.75*   | 229   | 26    |
| LH225    | 67.5*   | 163      | 140   | 163   |
| NKH8431  | 233.75  | 146**    | 343   | 203   |
| NP2011   | 123.5   | 55.25**  | 207   | 96    |
| NP2031   | 245.25  | 179.5    | 329   | 261   |
| NP2151   | 176.25  | 149      | 227   | 206   |
| NP764    | 82*     | 22.5**   | 103   | 39    |
| NP942    | 119.5*  | 35.75**  | 149   | 67    |
| PH06N    | 162     | 83**     | 235   | 128   |
| PH09E    | 139.75  | 208.25   | 180   | 279   |
| PH41E    | 178*    | 68.67**  | 194   | 85    |
| PH44A    | 207.5*  | 94       | 234   | 154   |
| PHJ89    | 106.25  | 162.5    | 234   | 201   |
| PHN46    | 187.25  | 147.25   | 283   | 310   |
| PHR31    | 85.25** | 32.25**  | 125   | 70    |
| PHW03    | 245     | 277.75   | 307   | 333   |
| PHW20    | 179     | 53*      | 277   | 162   |
| WQCD10   | 210.25  | 237      | 290   | 274   |

526 To further explore genetic differences in pollen storability, we evaluated the utility of our  
 527 process across 24 inbred lines (Table 1) that represented a wide variability within US Dent  
 528 germplasm (White et al., 2020). Impe et al. (2020) observed that *in vitro* pollen germination  
 529 between inbred lines PH207, A188, B73, and A183 ranged from 0.2% to 4.5%, suggesting that  
 530 genetics could influence storability. However, our method worked effectively across all 24



531 inbred lines with an average of 67 to 245 kernels per ear harvested at day zero and a maximum  
532 of 103 to over 300 kernels harvested per ear (Table 5). Grain fill decreased on average between  
533 day zero and one from 158 ( $\pm 10.46$ ) to 121 ( $\pm 16.01$ ) kernels per ear. However, this is still  
534 equivalent to observing approximately 45% grain fill per ear on average across the 24 inbred  
535 lines.

536 On average, grain fill decreased between days zero and one as expected and significantly  
537 affected grain fill at harvest (Table 6). Seed set per storage interval was equivalent to the controls  
538 for 66% of the inbred lines on day zero and equal to the controls among 45% of the inbred lines  
539 on day one (Table 5). These results demonstrate that the efficient procedure for collection and  
540 storage of maize pollen works effectively across diverse genetic backgrounds within the US Dent  
541 germplasm.

542 **Table 6.** ANOVA describing the effect of inbred line and days of storage on average grain fill  
543 when pollen was collected from 24 different inbred lines and immediately used to pollinate  
544 LH244 or stored for 24 hours prior to pollination

|                        | <b>Number of Kernels</b> |                | <b>Percent Grain Fill</b> |                |
|------------------------|--------------------------|----------------|---------------------------|----------------|
|                        | <b>F</b>                 | <b>P-value</b> | <b>F</b>                  | <b>P-value</b> |
| <b>Inbred</b>          | 1.92                     | 0.06           | 1.16                      | 0.36           |
| <b>Days of Storage</b> | 5.44                     | 0.03           | 5.19                      | 0.03           |

545 We tested if the inbred line used as a pollen parent had a significant effect on grain fill using an  
546 analysis of variance. Inbred line did not have a significant effect on seed set (Table 6) and  
547 suggests the method is not limited by the choice of inbred line. Although, we did observe some  
548 variation in grain fill across the 24 inbred lines used as pollen parents, much of the variation  
549 could be the result of a day effect as pollen was collected across four different days due to  
550 variation in days to anthesis between the inbred lines (White et al., 2020).

551 Daily differences in humidity and temperature across the four collection dates could have  
552 influenced pollen desiccation during collection (Schoper et al., 1987a and 1987b; Roy et al.,  
553 1995). Additionally, differences in the water content of the silks among LH244 plants used as the  
554 seed parent could have reduced receptivity (Bassetti & Westgate, 1993) and led to variation in  
555 grain fill when plants are pollinated using the diverse set of inbred lines in this experiment. From  
556 routine utilization within our maize breeding program, we have not observed any limitations in  
557 the method due to the choice of inbred led line during hybrid seed generation. As an example, in  
558 one seed production nursery in Verona, WI in 2022, we used this method to collect pollen across  
559 30 unique inbred lines that included both ex-PVPs, current commercial inbred lines, and publicly  
560 developed double haploids from the WI-SS-MAGIC population (Michel et al., 2022). Collecting  
561 pollen across this diverse germplasm led to the generation of over 230 hybrids when mixed  
562 pollen was directly applied to plants with receptive silks or stored for 24 hours prior to  
563 application.

### 564 **3.6 Conclusion**

565 The purpose of the current study was to develop and evaluate a practical method for cost-  
566 effective and efficient collection and storage of maize pollen. A substrate was identified, PEEK-  
567 MP140, which is approximately the size of an individual pollen granule and is useful to produce  
568 a homogenized suspension that supports extension of pollen viability. Even after six days of  
569 storage, the method has the potential to maintain enough viable pollen granules such that at least  
570 50 maize kernels can be harvested per ear on average (Supplemental Table S3) and this method  
571 works across a diverse set of maize inbred lines (Table 5). While maize pollen can be maintained  
572 in a polyethylene-based substrate and kept in liquid nitrogen for later use (Barnabas & Rajki,

573 1976; Barnabas et al., 1988), this method is expensive and lacks efficiency. The method  
574 demonstrated here mitigates the latter two issues by utilizing a PEEK based media without deep-  
575 freezing. Using this method, stored maize pollen could be routinely utilized for seed production  
576 in a breeding program or genetics research.

577 Storage of maize pollen would facilitate crossing of germplasm with maturity differences that  
578 complicate regular planting and crossing. In these cases, maize pollen from an early-flowering  
579 inbred line could be collected, mixed, stored, and applied to silks of the late-flowering parent at  
580 the time they are receptive. Planting ‘delayed rows’, or additional rows sometime after the initial  
581 planting to increase the probability of synchronous pollen shed and silk emergence, is a widely  
582 used practice but has logistical complexities and is not always a viable strategy when new  
583 germplasm with unknown flowering characteristics is being used.

584 Efficient seed production is vital for plant breeding and genetics programs but is labor intensive  
585 and expensive. However, the time and cost of seed production can be reduced by collecting  
586 pollen and storing it in an appropriate substrate at a reduced concentration as it is estimated that  
587 over a million pollen grains are produced in a single tassel, but only 200 to 300 viable granules  
588 are needed to fertilize all the ovules on an inbred line. The idea of using stored maize pollen in  
589 the context of a breeding program has been explored since the early 1920s (Knowlton, 1922) but  
590 has had limited utility due to the cost, complexity, and repeatability of the process. We  
591 demonstrate a simple and cost-effective process that has practical utility for routine seed  
592 generation in breeding programs and genetics research.

593 **ACKNOWLEDGEMENTS**

594 The authors acknowledge Tim Osterhaus for assistance with data collection and harvest of the  
595 Summer 2022 experiments, Dr. Jose Varela for helpful discussions and recommendations during  
596 image acquisition of the 2021 samples, and the USDA Germplasm repository for providing  
597 useful germplasm. The work was supported by the National Institute of Food and Agriculture  
598 (NIFA), United States Department of Agriculture (USDA), and USDA Hatch Projects 1022702  
599 and 1015851. In addition, this research was partially supported by the National Institute of Food  
600 and Agriculture and United States Department of Agriculture Hatch grants 1020442 and  
601 1013262.

## 602 **CONFLICT OF INTEREST**

603 The authors declare no conflict of interest.

## 604 **SUPPLEMENTAL MATERIAL**

605 Supplemental File S1 provides a step-by-step list of instructions for executing the described  
606 method of pollen collection, storage, and application. Supplemental Figure S1 shows the visual  
607 rating scale used for determining percent grain fill. Supplemental Figure S2 provides example of  
608 ears at harvest pollinated with mixed pollen for the evaluation of maize pollen storability  
609 experiment. Supplemental Figure S3 provide examples of harvested ears pollinated with mixed  
610 pollen during routine utilization for hybrid seed production within our maize breeding program.  
611 Supplemental Table S1 has information on the number of kernels harvested during the  
612 assessment of storage substrate experiment. Supplemental Table S2 has the ANOVA table for  
613 the evaluation of timing of pollination experiment. Supplemental Table S3 provides the summary

614 statistics per each inbred line, storage interval, and planting date for the evaluation of pollen  
615 storability across planting dates experiment.

616 **REFERENCES**

- 617 Anthony, S., & Harlan, H. V. (1920). Germination of barley pollen. *Jour. Agr. Res.* 18, 525-536
- 618 Arisnabarreta, S., & Solari, F. (2017). Hybrid maize seed production yield associations with  
619 inbred line performance in multi-environment trials. *Crop Science*, 57, 3203-3216.  
620 <https://doi.org/10.2135/cropsci2017.04.0225>
- 621 Aylor, D.E. (2003). Rate of dehydration of corn (*Zea mays* L.) pollen in the air. *Journal of*  
622 *Experimental Botany* 54, 2307-2312. <https://doi.org/10.1093/jxb/erg242>
- 623 Aylor, D.E. (2004). Survival of maize (*Zea mays*) pollen exposed in the atmosphere.  
624 *Agricultural and Forest Meteorology* 123, 125-133.  
625 <https://doi.org/10.1016/j.agrformet.2003.12.007>
- 626 Bair, R. A., & Loomis, W. E. (1941). The germination of maize pollen. *Science*, 94, 168-169.  
627 [10.1126/science.94.2433.168.b](https://doi.org/10.1126/science.94.2433.168.b)
- 628 Barnabas, B., 1985. Effect of water loss on germination ability of maize (*Zea mays* L.) pollen.  
629 *Annals of Botany* 55, 201–204. <https://doi.org/10.1093/oxfordjournals.aob.a086892>
- 630 Barnabas, B., & Rajki, E. (1976). Storage of maize (*Zea mays* L.) pollen at –196°C in liquid  
631 nitrogen. *Euphytica*, 25, 747-752. <https://doi.org/10.1007/BF00041614>
- 632 Barnabas, B., Kovacs, G., Abranyi, A., & Pfahler, P. (1988). Effect of pollen storage by drying  
633 and deep-freezing on the expression of different agronomic traits in maize (*Zea mays*  
634 L.). *Euphytica*, 39, 221-225. <https://doi.org/10.1007/BF00037099>
- 635 Bassetti, P., & Westgate, M. E. (1993). Water deficit affects receptivity of maize silks. *Crop*  
636 *Science*, 33, 279-282. <https://doi.org/10.2135/cropsci1993.0011183X003300020013x>
- 637 Bateman, A.J. 1947a. Contamination of seed crops. II. Wind pollination. *Heredity* 1, 235–246
- 638 Bateman, A.J. 1947b. Contamination of seed crops. III. Relation of isolation distance. *Heredity*,  
639 1, 303–336
- 640 Berjak, P., Pammenter, N. W., & Vertucci, C. (1992). Homoiohydrous (recalcitrant) seeds:  
641 developmental status, desiccation sensitivity and the state of water in axes of *Landolphia*  
642 *kirkii* Dyer. *Planta*, 186, 249-261. <https://doi.org/10.1007/BF00196255>

- 643 Buitink, J., Walters-Vertucci, C., Hoekstra, F. A., & Leprince, O. (1996). Calorimetric properties  
644 of dehydrating pollen (analysis of a desiccation-tolerant and an intolerant species). *Plant*  
645 *Physiology*, *111*, 235-242. <https://doi.org/10.1104/pp.111.1.235>
- 646 Collins, F. C., Lertmongkol, V., & Jones, J. P. (1973). Pollen Storage of Certain Agronomic  
647 Species in Liquid Air 1. *Crop Science*, *13*, 493-494.  
648 <https://doi.org/10.2135/cropsci1973.0011183X001300040030x>
- 649 Connor, K. F., & Towill, L. E. (1993). Pollen-handling protocol and hydration/dehydration  
650 characteristics of pollen for application to long-term storage. *Euphytica*, *68*, 77-84.  
651 <https://doi.org/10.1007/BF00024157>
- 652 Cope, J., & Krone, T., (2016). *Large scale method for dispensing grains of pollen* (U.S. Patent  
653 No. 9,433,161). U.S. Patent and Trademark Office. <https://rb.gy/ik0fb0>
- 654 Crisp, P., & Grout, B. W. W. (1984). Storage of broccoli pollen in liquid nitrogen. *Euphytica*, *33*,  
655 819-823. <https://doi.org/10.1007/BF00021908>
- 656 DuPlessis, D. P., & Dijkhuis, F. J. (1967). The influence of time lag between pollen shedding  
657 and silking on the yield of maize. *South African Journal of Agricultural Science*, *10*, 667-  
658 674
- 659 Heslop-Harrison, J. (1979). An interpretation of the hydrodynamics of pollen. *American journal*  
660 *of botany*, *66*, 737-743. <https://doi.org/10.1002/j.1537-2197.1979.tb06277.x>
- 661 Howard, H. W. (1958). The storage of potato pollen. *American Potato Journal*, *35*, 676-678.  
662 <https://doi.org/10.1007/BF02855448>
- 663 Impe, D., Reitz, J., Köpnick, C., Rolletschek, H., Börner, A., Senula, A., & Nagel, M. (2020).  
664 Assessment of pollen viability for wheat. *Frontiers in Plant Science*, *10*, 1588.  
665 <https://doi.org/10.3389/fpls.2019.01588>
- 666 Iwanami, Y., & Nakamura, N. (1972). Storage in an organic solvent as a means for preserving  
667 viability of pollen grains. *Stain Technology*, *47*, 137-139.  
668 <https://doi.org/10.3109/10520297209116468>
- 669 Jones, M. D., & Newell, L. C. (1948). Longevity of pollen and stigmas of grasses: Buffalograss,  
670 *Buchloe dactyloides* (Nutt.) Engelm., and corn, *Zea mays* L. *Journal of the American*  
671 *Society of Agronomy*, *3*, 195-204
- 672 Jones, M. D., & Brooks, J. S. (1950). *Effectiveness of distance and border rows in preventing*  
673 *outcrossing in corn*. Oklahoma Agricultural Experiment Station
- 674 Kessler, E. V. (1930). The pollen of *Solanum tuberosum* L., its germination and the growth of  
675 the pollen tube. *Angewandte Botanik*, *12*, 362-418
- 676 Kiesselbach, T. A. (1999). *The structure and reproduction of corn*. Cold spring harbor laboratory  
677 press

- 678 Knowlton, H. E. (1922). *Studies in pollen with special reference to longevity*. (Vol. 52). Cornell  
679 University
- 680 Luna V, S., Figueroa M, J., Baltazar M, B., Gomez L, R., Townsend, R., & Schoper, J. B.  
681 (2001). Maize pollen longevity and distance isolation requirements for effective pollen  
682 control. *Crop Science*, 41, 1551-1557. <https://doi.org/10.2135/cropsci2001.4151551x>
- 683 Michel, K. J., Lima, D. C., Hundley, H., Singan, V., Yoshinaga, Y., Daum, C., ... & Kaeppler, S.  
684 M. (2022). Genetic mapping and prediction of flowering time and plant height in a maize  
685 Stiff Stalk MAGIC population. *Genetics*, 221, iyac063.  
686 <https://doi.org/10.1093/genetics/iyac063>
- 687 Nath, J., & Anderson, J. O. (1975). Effect of freezing and freeze-drying on the viability and  
688 storage of *Lilium longiflorum* L. and *Zea mays* L. pollen. *Cryobiology*, 12(1), 81-88.  
689 [https://doi.org/10.1016/0011-2240\(75\)90042-5](https://doi.org/10.1016/0011-2240(75)90042-5)
- 690 Neuffer, M. G., & Coe, E. H. (1978). Paraffin oil technique for treating mature corn pollen with  
691 chemical mutagens. *Maydica (Italy)*, 23, 21-28
- 692 Raynor, G. S., Ogden, E. C., & Hayes, J. V. (1972). Dispersion and deposition of corn pollen  
693 from experimental sources 1. *Agronomy Journal*, 64, 420-427.  
694 <https://doi.org/10.2134/agronj1972.00021962006400040004x>
- 695 Roberts, E. H. (1973). Predicting the storage life of seeds. In *Proceedings*.
- 696 Rodgers, H.J., and H.C. Parkes. 1995. Transgenic plants and the environment. *Journal of*  
697 *Experimental Botany*, 46, 467-488. <https://doi.org/10.1093/jxb/46.5.467>.
- 698 Roy, S.K., S.M.L. Rahaman, & A.B.M. Salahuddin. 1995. Pollination control in relation to seed  
699 yield and effect of temperature on pollen viability of maize (*Zea mays* L.). *Indian J.*  
700 *Agric. Sci. (Cambridge)* 65, 785-788
- 701 Schoper, J.B., R.J. Lambert, B.L. Vasilas, & M.E. Westgate. 1987a. Plant factors controlling  
702 seed set in maize: the influence of silk, pollen, and ear-leaf water status and tassel heat  
703 treatment at pollination. *Plant Physiology*. 83, 121-125.  
704 <https://doi.org/10.1104/pp.83.1.121>
- 705 Schoper, J.B., R.J. Lambert, & B.L. Vasilas. 1987b. Pollen viability, pollen shedding, and  
706 combining ability for tassel heat tolerance in maize. *Crop Science*, 27, 27-31.  
707 <https://doi.org/10.2135/cropsci1987.0011183X002700010007x>
- 708 Serratos, J. A. (1997). Gene flow among maize landraces, improved maize varieties, and  
709 teosinte: implications for transgenic maize. CIMMYT
- 710 Settles, A. M. (2020). EMS mutagenesis of maize pollen. *Plant Embryogenesis: Methods and*  
711 *Protocols*, 25-33. [https://doi.org/10.1007/978-1-0716-0342-0\\_3](https://doi.org/10.1007/978-1-0716-0342-0_3)

- 712 Towill, L. E. (1981). Liquid Nitrogen Preservation of Pollen from Tuber-bearing Solanum  
713 Species, 2. *HortScience*, 16, 177-179. <https://doi.org/10.21273/HORTSCI.16.2.177>
- 714 Tyagi, R. K., & Hymowitz, T. (2003). Pollen from Glycine species survive cryogenic  
715 exposure. *CryoLetters*, 24, 119-124
- 716 Westgate, M. E., & Boyer, J. S. (1986). Reproduction at low and pollen water potentials in maize  
717 1. *Crop science*, 26, 951-956.  
718 <https://doi.org/10.2135/cropsci1986.0011183X002600050023x>
- 719 White, M. R., Mikel, M. A., de Leon, N., & Kaeppler, S. M. (2020). Diversity and heterotic  
720 patterns in North American proprietary dent maize germplasm. *Crop Science*, 60, 100-  
721 114. <https://doi.org/10.1002/csc2.20050>.
- 722 Wodehouse, R.P. 1935. Pollen grains; their structure, identification and significance in Science  
723 and Medicine. McGraw-Hill Book Co., Inc., New York, 575 pp.
- 724 Wych, R.D. 1988. Production of hybrid seed corn. In: G.F. Sprague and J.W. Dudley, editors,  
725 Corn and corn improvement. 3rd ed. Agron. Monogr. 18. ASA, CSSA, SSSA, Madison,  
726 WI. p. 565–607. <https://doi.org/10.2134/agronmonogr18.3ed.c>.
